# Supplementary material for: Heterozygous mutations affecting the protein kinase domain of CDK13 cause a syndromic form of developmental delay and intellectual disability
Source: PubMed Central journal article supplement (PMC5749303; doi:10.1136/jmedgenet-2017-104620), 2017-10-11
Supplement: jmedgenet-2017-104620supp001.pdf [file jmedgenet-2017-104620supp001.pdf]

| Pt number (DDD number)   | 1 (271894)                                     | 2 (262889)                                                                                            | 3 (259077)                   | 4 (261411)                                            | 5 (264961)                                                                           |
|--------------------------|------------------------------------------------|-------------------------------------------------------------------------------------------------------|------------------------------|-------------------------------------------------------|--------------------------------------------------------------------------------------|
| Age                      | 8.3                                            | 7                                                                                                     | 16.75                        | 14                                                    | 4.39                                                                                 |
| Sex                      | F                                              | M                                                                                                     | F                            | F                                                     | F                                                                                    |
| Gestational age at birth | 38/40                                          | 38/40                                                                                                 | 38/40                        | 34/40                                                 | 36/40                                                                                |
| Birth weight (kg)        | 2.636 (19th centile)                           | 2 (1st centile)                                                                                       | 2.58 (15th centile)          | 1.8 (14th centile)                                    | 2.5 (42nd centile)                                                                   |
| Birth height             |                                                |                                                                                                       |                              | *                                                     |                                                                                      |
| Birth OFC (cm)           | 30.8 (2nd centile)                             |                                                                                                       |                              | *                                                     | 34 (92nd centile)                                                                    |
| Current weight (kg)      | 27 (48th centile)                              | 17.5 (0.4th centile)                                                                                  | 73.4 (91st-98th centile)     | 54.1 (67th)                                           | 15.5 (27th centile)                                                                  |
| Current height (cm)      | 123 (9th-25th centile)                         | 108.5 (0.4th centile)                                                                                 | 150.5 (0.4th-2nd centile)    | 148.8 (5th centile)                                   | 94 (1st centile)                                                                     |
| Current OFC              | 50.5 (1st centile)                             | 49 (< 0.4th centile)                                                                                  | 54 (9th-25th centile)        | 51 (at chronological age 8.87 years; 11th centile)    | 47.5 (1st centile)                                                                   |
| Developmental delay      | Yes                                            | Yes                                                                                                   | speech and language delay    | Yes                                                   | Yes                                                                                  |
| ID                       | Yes                                            | Yes                                                                                                   | Yes (moderate)               | Yes                                                   | Yes (moderate/ severe)                                                               |
| Autism                   | Yes (mild)                                     |                                                                                                       | Yes                          | Yes                                                   | No                                                                                   |
| Seizures                 | No                                             | No                                                                                                    | No                           | No                                                    | No                                                                                   |
| Feeding difficulties     | Yes (gastrostomy fed from 4 months to 4 years) | Sensory-based feeding difficulties. He is feed orally as well as through his percutaneous gastrostomy | No                           | Yes (from infancy, severe gastro-oesophageal reflux). | Poor suck for few days at birth. GO reflux. NGT inserted at 4 months for 3-4 months. |
| Eye problems             | Poor 3-dimensional vision                      | Divergent squint in his right eye (initially, bilateral squint)                                       | Reading glasses              | Lacrimal duct atresia                                 | Astigmatism                                                                          |
| Hearing loss             | No                                             | No. Grommet insertion February 2010                                                                   | mild unilateral hearing loss | High frequency sensorineural hearing impairment       | Bilateral grommets inserted at 3 years                                               |

| Pt number (DDD number)    | 1 (271894)                                                                                                    | 2 (262889)                                                                                                                                | 3 (259077)                                                                                                                                             | 4 (261411)                                                                                                                                                                                               | 5 (264961)                                                                                                                                                                                               |
|---------------------------|---------------------------------------------------------------------------------------------------------------|-------------------------------------------------------------------------------------------------------------------------------------------|--------------------------------------------------------------------------------------------------------------------------------------------------------|----------------------------------------------------------------------------------------------------------------------------------------------------------------------------------------------------------|----------------------------------------------------------------------------------------------------------------------------------------------------------------------------------------------------------|
| <b>Facial dysmorphism</b> | Hypertelorism, USPFs, wide nasal bridge, short philtrum, glabellar haemangioma noted at 14 months, now faded. | Arched eyebrows, USPFs, bilateral ptosis, low-set ears, anteverted ears, triangular nose, flat philtrum, small mouth, very thin upper lip | Short palpebral fissures, hypertelorism, USPFs, low-set ears, posteriorly-rotated ears, short philtrum, small mouth                                    | Flat facial profile, epicanthic folds, long eyelashes, depressed nasal bridge, low set and posteriorly rotated ears, a very short nasal columella, long philtrum, thin upper lip, small mouth and tongue | Long eyelashes, telecanthus, epicanthic folds, low-set ears, short philtrum, wide nasal bridge, broad nasal tip, low posterior hairline, capillary haemangioma (faded) over nasal root when seen at 9/12 |
| <b>Digital anomalies</b>  | 5th finger clinodactyly, extra crease 5th finger                                                              | No                                                                                                                                        | Tapering fingers with 5th finger clinodactyly, radial deviation at PIP joint of both 4th fingers, fetal finger pads, broad big toes with hallux valgus | Prominent foetal finger pads, relatively short fingers, deep-set fingernails                                                                                                                             | Broad tips to fingers                                                                                                                                                                                    |
| <b>Limbs</b>              | Extra skin crease on forearms and back of right thigh                                                         | Circumferential skin folds                                                                                                                | Circumferential skin folds                                                                                                                             | Normal                                                                                                                                                                                                   | No                                                                                                                                                                                                       |
| <b>Palate</b>             | Normal                                                                                                        |                                                                                                                                           | Short uvula                                                                                                                                            | Normal                                                                                                                                                                                                   | No                                                                                                                                                                                                       |
| <b>CVS</b>                | ASD and mild pulmonary branch stenosis                                                                        | Perimembranous VSD with pulmonary valve stenosis                                                                                          | Normal echo                                                                                                                                            | Normal echo and ECG                                                                                                                                                                                      | No but never had an echo                                                                                                                                                                                 |
| <b>Genital anomalies</b>  |                                                                                                               | Paraphimosis                                                                                                                              | None. Menarche aged 13.5 years                                                                                                                         | Not specified                                                                                                                                                                                            | Wide labial opening with partially deficient hymen                                                                                                                                                       |
| <b>Bowel problems</b>     |                                                                                                               | Gastro-oesophageal reflux in infancy                                                                                                      | Constipation                                                                                                                                           | Anal stenosis, severe gastro-oesophageal reflux, eosinophilic colitis, recurrent GI infections                                                                                                           | No                                                                                                                                                                                                       |
| <b>Urinary problems</b>   |                                                                                                               | No                                                                                                                                        | No                                                                                                                                                     | Nil                                                                                                                                                                                                      | No                                                                                                                                                                                                       |
| <b>Skin</b>               | Normal                                                                                                        | Hypertrichosis over elbows, legs and back                                                                                                 | possible sebaceous cyst over scalp                                                                                                                     | Nil                                                                                                                                                                                                      | No                                                                                                                                                                                                       |

| Pt number (DDD number) | 1 (271894)                                                                                            | 2 (262889)                                                                 | 3 (259077)                                                            | 4 (261411)                                                                                                                                                        | 5 (264961)   |
|------------------------|-------------------------------------------------------------------------------------------------------|----------------------------------------------------------------------------|-----------------------------------------------------------------------|-------------------------------------------------------------------------------------------------------------------------------------------------------------------|--------------|
| Spine                  | Normal                                                                                                | No                                                                         | Straight                                                              | Nil                                                                                                                                                               | No           |
| Neurological findings  |                                                                                                       | Hypotonia                                                                  | None                                                                  | Global developmental delay and intellectual disability                                                                                                            | No           |
| MRI brain              | Severe hypoplasia of the corpus callosum with only the anterior genu present. Arnold-Chiari 1 variant | Underdeveloped corpus callosum                                             | Normal                                                                | Normal (including pituitary)                                                                                                                                      | MRI not done |
| Array                  | Normal                                                                                                | Normal                                                                     | Normal                                                                | Normal                                                                                                                                                            | Not done     |
| CDK13 mutation         | p.Gly714Arg                                                                                           | p.Gly717Arg                                                                | pGly717Arg (mosaic; higher mutation load in saliva compared to blood) | p.Val719Gly                                                                                                                                                       | p.Lys734Arg  |
| Other features         | Microdontia                                                                                           | Nasal speech. Sacral dimple. Recurrent mouth ulcers, occasional nosebleeds | Obesity (BMI 33.2; >99.6th centile)                                   | Sacral dimple, delayed ossification of hand bones of 9 months, borderline growth hormone deficiency, oligodontia, thick curly hair, obesity with onset of puberty | Poor sleep   |
| Previous diagnosis     | Ohdo-like                                                                                             | Ohdo syndrome                                                              | Ohdo syndrome                                                         | Kabuki, Angelman and Smith-Magenis considered                                                                                                                     |              |

| Pt number (DDD number)   | 6 (258830)        | 7 (265645)                                                                                                                      | 8 (265813)                         | 9 (259460)                                        | 10 (270818)                                     |
|--------------------------|-------------------|---------------------------------------------------------------------------------------------------------------------------------|------------------------------------|---------------------------------------------------|-------------------------------------------------|
| Age                      | 12.68             | 11                                                                                                                              | 4                                  | 4.84                                              | 8.16                                            |
| Sex                      | F                 | F                                                                                                                               | F                                  | F                                                 | M                                               |
| Gestational age at birth | 35/40             | 40/40                                                                                                                           | 38/40                              | 41/40                                             | 39/40                                           |
| Birth weight (kg)        | 1.7 (3rd centile) | 3.64 (70th centile)                                                                                                             | 2.5kg (9th centile)                | 3.31 (42nd centile)                               | 2.552 (2nd-9th centile)                         |
| Birth height             |                   |                                                                                                                                 |                                    |                                                   |                                                 |
| Birth OFC (cm)           |                   |                                                                                                                                 |                                    | 34 cm (33rd centile)                              | 2nd centile                                     |
| Current weight (kg)      | 41 (59th centile) | 22.5 (34th centile) at age 7                                                                                                    | 15.1 (9th centile)                 | 10.06 (9th centile)                               | 19.7 (0.4th-2nd centile)                        |
| Current height (cm)      | 136 (4th centile) | 106.8 (1st centile) at age 7                                                                                                    | 95.8 (0.4th centile)               | 81 cm ('5th centile)                              | 121.5 (9th-25th centile)                        |
| Current OFC              | 53 (16th centile) | 51.2 (10th centile); 53 cm on 17.11.15 (9th-25th centile) aged 11 years                                                         | 46.7 (<0.4th)                      | 47 (8th centile)                                  | 44 (<0.4th centile at 1.25 y)                   |
| Developmental delay      | Yes               | Yes                                                                                                                             | Yes, especially speech             | Yes                                               | Yes                                             |
| ID                       | Yes               | Yes                                                                                                                             | Yes (moderate)                     | Yes (moderate)                                    | Yes                                             |
| Autism                   | No                | Yes                                                                                                                             | No                                 | No                                                | Yes                                             |
| Seizures                 | No                | History of absence seizures with normal EEG. Single generalised seizure. Diagnosis of autonomic seizures and cyclical vomiting. | yes absences, myoclonic, grand mal | Febrile seizures age 1, none since                | Yes (absences, on Valproate)                    |
| Feeding difficulties     | Neonatal period   | NG fed for the first eight to nine months of life, then required gastrostomy.                                                   | Yes                                | Yes, velopharyngeal dysfunction, abnormal swallow | Very slow feeder at birth, irritable with feeds |
| Eye problems             | Squint, myopia    | Squint                                                                                                                          | No                                 | No                                                | No                                              |
| Hearing loss             |                   | No                                                                                                                              | No                                 | No                                                | No                                              |

| Pt number (DDD number)    | 6 (258830)                                                                                  | 7 (265645)                                                                                                                                                                                                   | 8 (265813)                                                                                                                                                                 | 9 (259460)                                                                                                                  | 10 (270818)                                                                               |
|---------------------------|---------------------------------------------------------------------------------------------|--------------------------------------------------------------------------------------------------------------------------------------------------------------------------------------------------------------|----------------------------------------------------------------------------------------------------------------------------------------------------------------------------|-----------------------------------------------------------------------------------------------------------------------------|-------------------------------------------------------------------------------------------|
| <b>Facial dysmorphism</b> | Plagiocephaly, short palpebral fissures, ptosis, USPFs, small mouth with downturned corners | Highly-arched, thick eyebrows, USPFs, epicanthic folds, preauricular pit, hypertelorism, low-set ears, posteriorly-rotated ears, prominent nasal bridge, thin upper lip, small mouth, low posterior hairline | Brachycephaly, thick hair, low forehead, thick eyebrows, hypertelorism, telecanthus, epicanthic folds, low-set ears, overfolded helix, small mouth with downturned corners | Hypertelorism, USPFs, bulbous nose, small mouth, thin upper lip. Very curly hair, not in keeping with other family members. | Lots of head hair, DSPFs, abnormality of pinna, short nose, long philtrum, thin upper lip |
| <b>Digital anomalies</b>  | Camptodactyly of 2nd-5th fingers                                                            | Hyperextensible finger joints, 5th finger clinodactyly                                                                                                                                                       | Tapering fingers, proximal thumbs                                                                                                                                          | 5th finger clinodactyly, 2nd and 3rd toe clinodactyly                                                                       | 5th finger camptodactyly                                                                  |
| <b>Limbs</b>              |                                                                                             |                                                                                                                                                                                                              |                                                                                                                                                                            | Joint hypermobility                                                                                                         | Normal                                                                                    |
| <b>Palate</b>             |                                                                                             | No                                                                                                                                                                                                           |                                                                                                                                                                            | Normal                                                                                                                      | Normal                                                                                    |
| <b>CVS</b>                | ASD, VSD                                                                                    | VSD                                                                                                                                                                                                          | mild pulmonary artery branch stenosis, ASD                                                                                                                                 | ASD                                                                                                                         | Secundum ASD - tiny and haemodynamically insignificant                                    |
| <b>Genital anomalies</b>  |                                                                                             |                                                                                                                                                                                                              |                                                                                                                                                                            | No                                                                                                                          | Normal                                                                                    |
| <b>Bowel problems</b>     |                                                                                             | Episodic vomiting, gastro-oesophageal reflux, constipation                                                                                                                                                   | Constipation                                                                                                                                                               | No                                                                                                                          | Constipation                                                                              |
| <b>Urinary problems</b>   |                                                                                             |                                                                                                                                                                                                              |                                                                                                                                                                            | No                                                                                                                          | No                                                                                        |
| <b>Skin</b>               | Dry skin                                                                                    |                                                                                                                                                                                                              | hypertrichosis                                                                                                                                                             | Normal                                                                                                                      | Normal                                                                                    |

| Pt number (DDD number)       | 6 (258830)      | 7 (265645)                                                      | 8 (265813)  | 9 (259460)                                             | 10 (270818)                                   |
|------------------------------|-----------------|-----------------------------------------------------------------|-------------|--------------------------------------------------------|-----------------------------------------------|
| <b>Spine</b>                 | Hyperlordosis   | Scoliosis                                                       |             | Normal                                                 | Normal                                        |
| <b>Neurological findings</b> |                 | Spastic diplegia                                                |             | Hypotonia                                              | Motor tics                                    |
| <b>MRI brain</b>             | Normal          | Periventricular leukomalacia                                    | Normal      | MRI not done                                           | Absent corpus callosum                        |
| <b>Array</b>                 | Normal          | Normal                                                          | Normal      | Normal                                                 | Normal                                        |
| <b>CDK13 mutation</b>        | p.Arg751Gln     | p.Asn842Ser                                                     | p.Asn842Ser | p.Asn842Ser                                            | p.Asn842Ser                                   |
| <b>Other features</b>        | Truncal obesity | EEG normal, given diagnosis of Panayiotopoulos syndrome aged 5y |             | Pica. Central sleep apnoea requiring overnight oxygen. | Only 2 hours sleep in 24 hours (on melatonin) |
| <b>Previous diagnosis</b>    |                 |                                                                 | CHARGE-like |                                                        | Rubinstein-Taybi syndrome                     |

| Pt number (DDD number)   | 11 (not in DDD)                                     | 12 (331720)                    | 13 (264613)            | 14 (270857)                                                             | 15 (301509)                                                    |
|--------------------------|-----------------------------------------------------|--------------------------------|------------------------|-------------------------------------------------------------------------|----------------------------------------------------------------|
| Age                      | 4.67                                                | 10                             | 8.33                   | 8.42                                                                    | 8.16                                                           |
| Sex                      | F                                                   | F                              | F                      | F                                                                       | F                                                              |
| Gestational age at birth | 37/40                                               | 37/40 weeks (cesarean section) | 38/40                  | 40/40                                                                   | term                                                           |
| Birth weight (kg)        | 3.054 (75th centile)                                | 2.484 (2nd-9th centile)        | 3.061 (55th centile)   | 3.4 (50th centile)                                                      | 3.71 (75th to 91st centile)                                    |
| Birth height             | 47                                                  |                                |                        |                                                                         |                                                                |
| Birth OFC (cm)           | 34 (75th-91st centile)                              | 34 cm (75th-91st centile)      |                        |                                                                         |                                                                |
| Current weight (kg)      | 13.8 (0.4th-2nd centile)                            | 17 kg (<0.4th centile)         | 20.5 (2nd-9th centile) | 26.3 (50th centile)                                                     | 33.6 (86th centile)                                            |
| Current height (cm)      | 98.7 (3rd centile)                                  | 120 cm (<0.4th centile)        | 116.5 (<2nd centile)   | 127.5 (25th centile)                                                    | 126.1 (34th centile)                                           |
| Current OFC              | 49.2 (30th centile)                                 | 46 cm (<0.4th centile)         | 52 (25th centile)      | 53 (25th-50th centile)                                                  | 51.6 (49th centile)                                            |
| Developmental delay      | Yes (mild) - walked at 19 months, mild speech delay | Yes                            | Yes                    | Yes                                                                     | moderate global                                                |
| ID                       | No (low normal range; non verbal Wechsler IQ: 86)   | Yes (severe)                   | Yes                    | Yes                                                                     | Currently 3 years behind at school. Gap increasing             |
| Autism                   | No                                                  | No                             | No (autistic traits)   | No                                                                      | Not diagnosed, but has hand flapping ++ and motor steryotypies |
| Seizures                 | No                                                  | No                             | No                     | Generalised tonic-clonic and focal                                      |                                                                |
| Feeding difficulties     | Neonatal period                                     | Yes (neonatal)                 | Infancy                | Yes (tube fed from 2 months, gastrostomy fed from 11 months to 5 years) | Slow to handle mixed textures, but okay now                    |
| Eye problems             | No                                                  | No (narrow lacrimal duct)      | Squint, mild ptosis    | No                                                                      | Bilateral esotropia, especially when tired                     |
| Hearing loss             | No                                                  | No                             | No                     | No                                                                      | No hearing loss                                                |

| Pt number (DDD number)    | 11 (not in DDD)                                                                                                                                                        | 12 (331720)                            | 13 (264613)                                              | 14 (270857)                                                                                                                          | 15 (301509)                                                                                     |
|---------------------------|------------------------------------------------------------------------------------------------------------------------------------------------------------------------|----------------------------------------|----------------------------------------------------------|--------------------------------------------------------------------------------------------------------------------------------------|-------------------------------------------------------------------------------------------------|
| <b>Facial dysmorphism</b> | Glabellar congenital oedema and haemangioma, prominent metopic suture, hypertelorism, USPFs, posteriorly rotated ears, wide nasal bridge, broad nasal tip, small mouth | Yes                                    | Medial epicanthic folds, broad nasal bridge, small mouth | Glabellar haemangioma, short USPFs, telecanthus, medial epicanthic folds, broad nasal bridge, posteriorly rotated ears, small mouth. | Blepharophimosis, epicanthic folds, broad nasal tip, tented upper lip, posteriorly rotated ears |
| <b>Digital anomalies</b>  | 5th finger clinodactyly, deep palmar creases                                                                                                                           | Fetal pads and 5th finger clinodactyly |                                                          | Fetal finger pads                                                                                                                    | Tapering digits, broad sandle gap in feet                                                       |
| <b>Limbs</b>              | No problems                                                                                                                                                            | Narrow heel bilat                      |                                                          | Joint hypermobility                                                                                                                  | Pes planus                                                                                      |
| <b>Palate</b>             | No cleft but nasal speech (?VPD)                                                                                                                                       | No                                     | Normal                                                   | High-arched                                                                                                                          | Normal                                                                                          |
| <b>CVS</b>                | Secundum ASD (operated)                                                                                                                                                | ASD                                    |                                                          | None                                                                                                                                 | No abnormality - has seen cardiology                                                            |
| <b>Genital anomalies</b>  | No                                                                                                                                                                     | No                                     |                                                          | No                                                                                                                                   | No                                                                                              |
| <b>Bowel problems</b>     | No                                                                                                                                                                     | Loose stools before 2 yrs of age       |                                                          | Gastro-oesophageal reflux, constipation                                                                                              | No                                                                                              |
| <b>Urinary problems</b>   | No                                                                                                                                                                     | Urinary tract infection twice          |                                                          | Normal                                                                                                                               | No                                                                                              |
| <b>Skin</b>               | No problem                                                                                                                                                             | No                                     | Unusual wrinkled skin over palms, severe eczema          | Normal                                                                                                                               | normal                                                                                          |



| Pt number (DDD number)       | 11 (not in DDD)                                            | 12 (331720)                                                                                                                     | 13 (264613)                                                                                                                                                             | 14 (270857)                                                                   | 15 (301509)                                                                                                                                      |
|------------------------------|------------------------------------------------------------|---------------------------------------------------------------------------------------------------------------------------------|-------------------------------------------------------------------------------------------------------------------------------------------------------------------------|-------------------------------------------------------------------------------|--------------------------------------------------------------------------------------------------------------------------------------------------|
| <b>Spine</b>                 | sacral dimple (normal spinal USS)                          | No                                                                                                                              |                                                                                                                                                                         | Normal                                                                        | Straight                                                                                                                                         |
| <b>Neurological findings</b> | Normal                                                     | hypotonia                                                                                                                       | Hypotonia                                                                                                                                                               | Painful dystonic spasms                                                       | Hand flapping, steryotypies involving hand and feet                                                                                              |
| <b>MRI brain</b>             | MRI not done                                               | Thin corpus callosum                                                                                                            | Normal                                                                                                                                                                  | Normal                                                                        | MRI not done                                                                                                                                     |
| <b>Array</b>                 | Normal                                                     | 2008: dup chr3: 2715059-3212741 (pat inherited - suspect benign) and dup chr3: 3562164-3833018 (pat inherited - suspect benign) | Normal                                                                                                                                                                  | Normal                                                                        | normal                                                                                                                                           |
| <b>CDK13 mutation</b>        | p.Asn842Ser                                                | p.Asn842Asp                                                                                                                     | p.Arg860Gln                                                                                                                                                             | p.Val874Leu                                                                   | p.Asp896Asn                                                                                                                                      |
| <b>Other features</b>        | Left congenital torticollis, recurrent ENT and URTS (<4 y) | metopic synostosis, congenital diaphragmatic hernia, choledochal cyst (type 4), recurrent respiratory infections                | Low IgA and IgM levels, parental consanguinity, brother has homozygous MICU1 mutation with myopathy, movement disorder, developmental delay, autism and hypothyroidism. | Heterozygous for paternally-inherited p.Thr83Met variant in <i>TECTA</i> gene | had some small peg shaped teeth in primary dentition, plus oligodontia, secondary dentition normal. Has skin picking habit with scars on limbs++ |
| <b>Previous diagnosis</b>    |                                                            | No diagnosis                                                                                                                    |                                                                                                                                                                         |                                                                               | Ohdo considered                                                                                                                                  |

|                                 |                        |
|---------------------------------|------------------------|
| <b>Pt number (DDD number)</b>   | <b>16 (271710)</b>     |
| <b>Age</b>                      | 3.54                   |
| <b>Sex</b>                      | F                      |
| <b>Gestational age at birth</b> | 36/40 (twin pregnancy) |
| <b>Birth weight (kg)</b>        | 2.693 (62nd centile)   |
| <b>Birth height</b>             |                        |
| <b>Birth OFC (cm)</b>           |                        |
| <b>Current weight (kg)</b>      | 14.32 (96th centile)   |
| <b>Current height (cm)</b>      | 92.1 (99th centile)    |
| <b>Current OFC</b>              |                        |
| <b>Developmental delay</b>      | Yes (mild)             |
| <b>ID</b>                       | Yes                    |
| <b>Autism</b>                   | Yes (mild)             |
| <b>Seizures</b>                 | No                     |
| <b>Feeding difficulties</b>     | Yes                    |
| <b>Eye problems</b>             | No                     |
| <b>Hearing loss</b>             |                        |

|                               |                                                                                                                                                 |
|-------------------------------|-------------------------------------------------------------------------------------------------------------------------------------------------|
| <b>Pt number (DDD number)</b> | <b>16 (271710)</b>                                                                                                                              |
| <b>Facial dysmorphism</b>     | Arched eyebrows, prominent forehead, deep-set eyes, hypertelorism, epicanthic folds, low-set ears, posteriorly-rotated ears, prominent ear crus |
| <b>Digital anomalies</b>      | Mild 5th finger clinodactyly                                                                                                                    |
| <b>Limbs</b>                  |                                                                                                                                                 |
| <b>Palate</b>                 |                                                                                                                                                 |
| <b>CVS</b>                    | Normal                                                                                                                                          |
| <b>Genital anomalies</b>      | No                                                                                                                                              |
| <b>Bowel problems</b>         | Mild constipation                                                                                                                               |
| <b>Urinary problems</b>       | No                                                                                                                                              |
| <b>Skin</b>                   | Normal                                                                                                                                          |

|                               |                   |
|-------------------------------|-------------------|
| <b>Pt number (DDD number)</b> | 16 (271710)       |
| <b>Spine</b>                  | Normal            |
| <b>Neurological findings</b>  | Hypotonia         |
| <b>MRI brain</b>              | MRI not done      |
| <b>Array</b>                  | Not done          |
| <b>CDK13 mutation</b>         | c.2898-1G>A       |
| <b>Other features</b>         | No other features |
| <b>Previous diagnosis</b>     | Ohdo-like         |
